# Supplementary material for: Improved overall hydrogen storage properties of a CsH and KH co-doped Mg(NH2)2/2LiH system by forming mixed amides of Li–K and Cs–Mg
Source: Royal Society of Chemistry journal article supplement (doi:10.1039/c7ra05166b), 2017-01-01
Supplement: c7ra05166b1.pdf [file c7ra05166b1.pdf]

## Electronic Supplementary Information

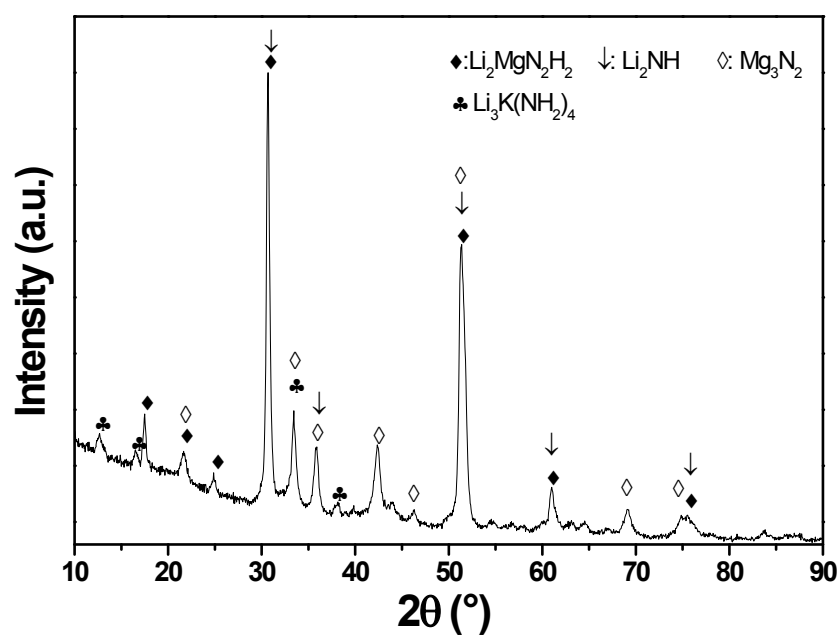

Fig. S1 XRD pattern of the  $\text{LiNH}_2\text{-Li}_2\text{Mg}_2\text{N}_3\text{H}_3\text{-0.84LiH-0.16KH}$  sample dehydrogenated at 280 °C.
